# Supplementary material
Source: PubMed Central journal article supplement (PMC3882905)
Supplement: mmc1.pdf [file mmc1.pdf]

The American Journal of Human Genetics, Volume 93

## **Supplemental Data**

### **Exome Sequence Reveals Mutations in CoA Synthase as a Cause of Neurodegeneration**

#### **with Brain Iron Accumulation**

**Sabrina Dusi, Lorella Valletta, Tobias B. Haack, Yugo Tsuchiya, Paola Venco, Sebastiano Pasqualato, Paola Goffrini, Marco Tigano, Nikita Demchenko, Thomas Wieland, Thomas Schwarzmayer, Tim M. Strom, Federica Invernizzi, Barbara Garavaglia, Allison Gregory, Lynn Sanford, Jeffrey Hamada, Conceição Bettencourt, Henry Houlden, Luisa Chiapparini, Giovanna Zorzi, Manju A. Kurian, Nardo Nardocci, Holger Prokisch, Susan Hayflick, Ivan Gout, and Valeria Tiranti**

**Table S1.** Next generation Sequencing Statistics

| <b>Id</b> | <b>Type</b>    | <b>Reads</b> | <b>Mapped</b> | <b>Percent</b> | <b>Seq on (Gb)</b> | <b>bait</b> | <b>Avg cov</b> | <b>Cov 1x</b> | <b>Cov 4x</b> | <b>Cov 8x</b> | <b>Cov 20x</b> |
|-----------|----------------|--------------|---------------|----------------|--------------------|-------------|----------------|---------------|---------------|---------------|----------------|
| #55633    | SureSelect50Mb | 87259289     | 80916002      | 92.73          | 8.81               | 73.85       | 93.96          | 99.61         | 98.79         | 97.3          | 92.4           |

**Table S2.** Variants Identified by Exome Sequencing

| <b>Variants filtering</b>                                  |       |
|------------------------------------------------------------|-------|
| Synonymous variants                                        | 11846 |
| NSV                                                        | 11601 |
| NSV with frequency <0.1% in 'in-house and public databases | 340   |
| $\geq 2$ NSV / gene                                        | 22    |
| Genes carrying homozygous rare NSV                         | 12    |

NSV = missense, nonsense, stop/loss, splice site disruption, insertions, deletions

Table S3: detailed list of the 12 genes carrying homozygous rare NSV

| gene # | gene symbol | OMIM          | chromosomal position of identified variant           | UCSC transcript, predicted mutation at nucleotide and protein level        | dbSNP (rs number) | prefunction          | pph2                                   | Sift         | Occurrence of predicted recessive-type variants in 3,159 samples with unrelated phenotypes | Other arguments against a causal role                                                            |
|--------|-------------|---------------|------------------------------------------------------|----------------------------------------------------------------------------|-------------------|----------------------|----------------------------------------|--------------|--------------------------------------------------------------------------------------------|--------------------------------------------------------------------------------------------------|
| 1      | GUCA2A      | *139392       | chr1:42629092-42629092                               | uc001chd.1, c.265G>T, p.Glu89*                                             | rs147564899       | nonsense             |                                        | 0.39         | -                                                                                          | uc001chd.1, c.265G>T, p.Glu89* also found in healthy subjects I-2 and II-4 of family 1           |
| 2      | HRNR        | *114085       | chr1:152189999-152189999<br>chr1:152190002-152190002 | uc001ezt.1, c.4106G>T, p.Ser1369Phe<br>uc001ezt.1, c.4103G>A, p.Gly1368Asp |                   | missense<br>missense | benign<br>benign                       | 0.05<br>0.3  | >1000 other patients with predicted recessive type mutations and unrelated phenotypes      |                                                                                                  |
| 3      | ADAM8       | *602267       | chr10:135082994-135082994                            | uc021qbe.1, c.1903T>G, p.Trip635Gly                                        |                   | missense             | probably damaging                      |              | 16 other patients with predicted recessive type mutations and unrelated phenotypes         |                                                                                                  |
| 4      | FBXO47      | *609498       | chr17:37118301-37118301                              | uc002hrc.2, c.182-1G>A, p.?                                                |                   |                      | splice                                 |              | absence of mutations in 56 NBIA subjects                                                   | Suggested role as a tumor suppressor.                                                            |
| 5      | CACNB1      | *114207       | chr17:37353687-37353687                              | uc002hrc.2, c.62A>G, p.Glu21Gly                                            |                   | missense             | benign                                 | 0.17         | 1 other patient with predicted compound heterozygous mutations and mental retardation.     |                                                                                                  |
| 6      | COASY       | *609855       | chr17:40717686-40717686                              | uc010cyj.3, c.1582C>T, p.Arg528Cys                                         | rs140709867       | missense             | probably damaging                      | 0            | -                                                                                          |                                                                                                  |
| 7      | BZRAP1      | *610764       | chr17:56385086-56385086                              | uc002vxx.4, c.4869G>C, p. Gln1623His                                       | rs141226909       | missense             | possibly damaging                      | 0.12         | 52 other patients with predicted recessive type mutations and unrelated phenotypes         |                                                                                                  |
| 8      | C17orf47    | not available | chr17:56621291-56621291                              | uc002iwq.2, c.257C>T, p.Arg86Gln                                           |                   | missense             | benign                                 | 0.28         | 2 other patients with predicted recessive type mutations and unrelated phenotypes          |                                                                                                  |
| 9      | LRP1B       | *608766       | chr2:141641491-141641491                             | uc002vj.1, c.4064A>G, p.Asn1355Ser                                         |                   | missense             | probably damaging                      | 0.56         | 151 other patients with predicted recessive type mutations and unrelated phenotypes        |                                                                                                  |
| 10     | EVC2        | *607261       | chr4:5624616-5624616<br>chr4:5667370-5667370         | uc003gjj.3, p.2149C>G, p.His717Asp<br>uc003gjj.3, c.877C>T, p.Pro293Ser    |                   | missense<br>missense | probably damaging<br>probably damaging | 0.32<br>0.14 | 25 other patients with predicted recessive type mutations and unrelated phenotypes         | Associated with Ellis-van Creveld syndrome (MIM *607261)                                         |
| 11     | KIAA1797    | *614606       | chr9:20885216-20885216                               | uc003zoz.1, c.2612C>T, p.Ala871Val                                         | rs187954100       | missense             | benign                                 | 0.29         | 16 other patients with predicted recessive type mutations and unrelated phenotypes         |                                                                                                  |
| 12     | IFNW1       | *147553       | chr9:21141080-21141080                               | uc003zol.1, c.490A>G, p.Trip164Arg                                         | rs147009804       | missense             | probably damaging                      | 0            | -                                                                                          | uc003zol.1, c.490A>G, p.Trip164Arg also found in healthy subjects I-2, II-4 and II-5 of family 1 |

1 **Table S4.** Primer sequences and PCR conditions to amplify the 9 exons of *COASY* gene.

| Exons | Forward primer        | Reverse primer          | DNA polymerase        | Annealing Temp |
|-------|-----------------------|-------------------------|-----------------------|----------------|
| 1a    | GATTTTTGGATCCCCAGCCC  | CAAGAACCTCAAACGTGGCC    | <i>AmpliTaq Gold®</i> | 58°C           |
| 1b    | TCCCATACAGGCCTCTGCC   | GGCCTTAGCACCAATTGAGTG   | <i>AmpliTaq Gold®</i> | 60°C           |
| 2     | TGCTTGCCTGTTTCTTCACCT | CGGGCAAACCTGAGAACCAGTT  | GoTaq® <i>Flexi</i>   | 59°C           |
| 3     | GGAGCCTGGGTAGGAAGGG   | CTCAGCCTCATGCCTGGG      | GoTaq® <i>Flexi</i>   | 60°C           |
| 4     | CCTGGCAATGCTGGAGAGTAG | GGCCTGGCTAGCTCCTCACT    | GoTaq® <i>Flexi</i>   | 60°C           |
| 5     | GGCCTCTGTGCTCAGTTGTCT | GCAAGGTGGTGTGGGAACA     | GoTaq® <i>Flexi</i>   | 60°C           |
| 6     | CCCAGAATGCCATTTCCATT  | GACGTTCTCCAGGCAGAAC     | GoTaq® <i>Flexi</i>   | 59°C           |
| 7     | GAGGATGGCAACAGCTAAGGG | TTTGTCAGGAAGAATTCCAGCTC | GoTaq® <i>Flexi</i>   | 59°C           |
| 8     | CCCCCACACCATCCCTAC    | GATGAGTCTTGGGAATGCGCT   | GoTaq® <i>Flexi</i>   | 60°C           |
| 9     | TACTGCCTGACCCTGCCCT   | AAAGCTCGCCTCTGGCTAGC    | <i>AmpliTaq Gold®</i> | 60°C           |

2  
3 GoTaq® *Flexi* DNA Polymerase (Promega); *AmpliTaq Gold®* (Life Technologies) were used. PCR  
4 conditions were: 94°C, 1min (1 cycle); 94°C 30sec, annealing time was 30sec at the indicated  
5 temperatures, 72°C 1min (30 cycles).  
6  
7
